# Supplementary material for: The Precision Resuscitation With Crystalloids in Sepsis (PRECISE) Trial: A Trial Protocol
Source: PubMed Central journal article supplement (PMC11411385; doi:10.1001/jamanetworkopen.2024.34197), 2024-09-18
Supplement: jamanetwopen-e2434197-s001.pdf [file jamanetwopen-e2434197-s001.pdf]

## Data Sharing Statement

Bhavani. The Precision Resuscitation With Crystalloids in Sepsis (PRECISE) Trial. *JAMA Netw Open*. Published September 18, 2024. doi:10.1001/jamanetworkopen.2024.34197

### Data

**Data available:** Yes

**Data types:** Deidentified participant data

**How to access data:** Requests for data sharing should be directed to the corresponding author ([sbhava2@emory.edu](mailto:sbhava2@emory.edu)), and data will be accessible for a period of at least five years following the publication of the primary results.

**When available:** With publication

### Supporting Documents

**Document types:** None

### Additional Information

**Who can access the data:** De-identified patient data will be made available to researchers who provide a methodologically sound proposal, subject to approval by the study team.

**Types of analyses:** Any secondary analyses of the trial results.

**Mechanisms of data availability:** After approval of a proposal and a signed data access agreement.
